# Supplementary material
Source: HighWire-hosted journal article supplement (https://www.annfammed.org/highwire/filestream/8282/field_highwire_adjunct_files/0/Culler_Supp_Table.pdf)
Supplement: Culler_Supp_Table.pdf [file Culler_Supp_Table.pdf]

**Online Supplementary Material**

Culler SD, Parchman ML, Lozano-Romero R, et al. Cost estimates for operating a primary care practice facilitation program. *Ann Fam Med.* 2013;11(3):207-211.

<http://www.annfammed.org/content/11/3/207>

| <b>Supplemental Table 1. Detailed Breakout of Total Variable Cost of Providing Selected Practice Facilitation Activities to Primary Care Clinics (Median Cost and Range of Costs)</b> |                        |                           |
|---------------------------------------------------------------------------------------------------------------------------------------------------------------------------------------|------------------------|---------------------------|
| <b>Key Facilitation Activity</b>                                                                                                                                                      | <b>Median Cost, \$</b> | <b>Range of Costs, \$</b> |
| <b>Part A: variable cost of selected start-up activities</b>                                                                                                                          |                        |                           |
| Total facilitation orientation cost                                                                                                                                                   | 375                    | 291-627                   |
| Practice baseline evaluation activities                                                                                                                                               |                        |                           |
| Interviews                                                                                                                                                                            | 203                    | 138-208                   |
| Chart audits                                                                                                                                                                          | 1,298                  | 1,193-1,786               |
| Planning, debriefing, and documenting all evaluation activities <sup>a</sup>                                                                                                          | 480                    | 221-900                   |
| Data entry, analysis, and producing customized baseline feedback report                                                                                                               | 1,095                  | 1,013-1,275               |
| Other variable start-up costs                                                                                                                                                         | 1,067                  | 603-2,578                 |
| Total cost of all start-up activities                                                                                                                                                 | 4,517                  | 4,178-5,589               |
| <b>Part B: variable cost for practice facilitation activities</b>                                                                                                                     |                        |                           |
| Providing baseline feedback report to clinic                                                                                                                                          |                        |                           |
| Planning, meeting, and debriefing <sup>a</sup>                                                                                                                                        | 474                    | 340-732                   |
| Facilitation materials for clinics                                                                                                                                                    | 660                    | 530-1,525                 |
| Cost for baseline feedback report                                                                                                                                                     | 1,134                  | 968-2,100                 |
| All practice facilitation activities, per facilitation visit                                                                                                                          |                        |                           |
| Preparation and meeting activities                                                                                                                                                    | 79                     | 79-86                     |
| Debriefing and creating field notes <sup>a</sup>                                                                                                                                      | 111                    | 109-112                   |
| Telephone and e-mail correspondence                                                                                                                                                   | 17                     | 9-30                      |
| Cost per facilitation meeting                                                                                                                                                         | 210                    | 196-219                   |
| Total cost of actual practice facilitation activities during study                                                                                                                    | 1,315                  | 1,226-1,963               |
| Total cost of all practice facilitation activities                                                                                                                                    | 2,449                  | 2,194-4062                |
| <b>Part C: variable cost of monitoring following the practice facilitation</b>                                                                                                        |                        |                           |
| Preparation and meeting activities                                                                                                                                                    | 180                    | 150-261                   |
| Documentation, evaluation, and debriefing activities                                                                                                                                  | 271                    | 169-354                   |
| Total cost of all monitoring activities                                                                                                                                               | 448                    | 319-615                   |

<sup>a</sup>Debriefing time was calculated as a constant ratio of the average attendance at each facilitation meeting.
